1 **Title: Extreme weather events in the UK and resulting public health outcomes**

2

3 Dr Natalie Dickinson<sup>1\*</sup>, PhD, [natalie.dickinson@uws.ac.uk](mailto:natalie.dickinson@uws.ac.uk)

4 Dr Llinos Haf Spencer<sup>2,3</sup>, PhD, [llinos.spencer@southwales.ac.uk](mailto:llinos.spencer@southwales.ac.uk) and [llinospencer@rcsi.ie](mailto:llinospencer@rcsi.ie)

5 Dr Shuhua Yang<sup>3</sup>, PhD, [shuhuayang@rcsi.ie](mailto:shuhuayang@rcsi.ie)

6 Dr Caroline Miller<sup>1</sup>, [caroline.miller@uws.ac.uk](mailto:caroline.miller@uws.ac.uk)

7 Professor Andrew Hursthouse<sup>1</sup>, [Andrew.hursthouse@uws.ac.uk](mailto:Andrew.hursthouse@uws.ac.uk)

8 Professor Mary Lynch<sup>3</sup>, [maryalynch@rcsi.ie](mailto:maryalynch@rcsi.ie)

9 1. University of the West of Scotland, High Street, Paisley, Renfrewshire, Scotland, UK, PA1 2AX

10 2. University of South Wales, Glyntaff Campus, Cemetery Road, Pontypridd, Wales, UK, CF37 4BD

11 3. Faculty of Nursing and Midwifery, Royal College of Surgeons, 123 St. Stephen's Green, Ireland,  
12 D02 YN77

13 \*Corresponding author: Dr Natalie Dickinson, Health and Life Sciences, University of the West of  
14 Scotland, High Street, Paisley, Renfrewshire, Scotland, UK, PA1 2AX. [Natalie.dickinson@uws.ac.uk](mailto:Natalie.dickinson@uws.ac.uk)  
15 Tel: +44 (0) 7737781533

16

17 Word Count: 3985      Tables: 2      Figures: 1

18 **Abstract**

19 **Objectives:** Extreme Weather Events (EWEs) are increasingly frequent in the UK and can lead to  
20 adverse physical and mental health outcomes which may result in additional pressure on the NHS.  
21 The objective of this study is therefore to investigate the health impacts of EWEs on the population  
22 in the UK.

23 **Method:** A systematic review of the evidence was conducted. Seven databases were searched for  
24 studies related to the public health outcomes of EWEs.

25 **Results:** 48 papers met the criteria for inclusion (22 flood, 25 extreme temperature, 1 wind).  
26 Flooding is most associated with mental health concerns and associated social effects, whilst  
27 temperature extremes impact more on physical health.

28 **Conclusions:** Whilst there is a great deal of research on the physical and mental health impacts of  
29 EWEs in the UK, there is limited evidence on social health impacts, and little consideration of the  
30 economic costs of holistic health outcomes. Building resilience against the health impacts of EWEs is  
31 essential. Future studies should consider incorporating cost-benefit analyses (CBA) to investigate the  
32 economic costs of EWEs on populations and health systems in the UK.

33

34 **Introduction**

35 Extreme Weather Events (EWEs), including heatwaves, coldwaves, floods, storms and wildfires, are  
36 occurring with increased frequency worldwide, primarily driven by climate change (Walsh et al.  
37 2020). The Intergovernmental Panel on Climate Change (IPCC) state that human-induced climate

38 change has caused greater frequency and intensity of climate extremes globally, which has led to  
39 adverse impact on human health (Calvin et al., 2023). The impacts of EWEs in the United Kingdom  
40 (UK) are also becoming more pronounced; the UK has witnessed a notable increase in the frequency  
41 of severe weather incidents, such as heatwaves, floods and storms (Met Office 2022), with further  
42 changes predicted. The latest UK Climate Projections 2018 indicate a higher likelihood of warmer,  
43 wetter winters, hotter, drier summers, increased wildfires, more extreme weather events, and rising  
44 sea levels (Met Office 2022). Rising temperatures, leading to extreme heat in homes and other  
45 buildings, poses an increased risk to human health, wellbeing and productivity, and has been  
46 identified as one of the priority risk areas by the UK Climate Change Risk Assessment (UK  
47 Government, 2022).

48 Though a systematic review of EWEs across Europe was recently published (Weilhammer et al.  
49 2021), given the increase in EWEs in the UK, alongside the public health challenges of the ageing  
50 population, the healthcare crisis and socioeconomic deprivation, there is a need to consider the  
51 distribution of health implications for the population of the UK specifically, as well as the economic  
52 cost of EWEs for the NHS.

### 53 Aim

54 To investigate the impacts of EWEs on the UK population, public health and wellbeing outcomes. The  
55 protocol for this systematic review is on the Prospero database:

56 [https://www.crd.york.ac.uk/prospero/display\\_record.php?RecordID=357688](https://www.crd.york.ac.uk/prospero/display_record.php?RecordID=357688)

### 57 Method

58 Systematic review methods were utilised. The PICO and eligibility criteria are presented in Table 1  
59 (Schardt et al. 2007). Evidence is presented below and the search strategies for this are presented in  
60 Supplementary File 1.

### 61 Table 1 Population, Intervention, Context/Comparator and Outcome (PICO) framework.

62

63 Databases: Cochrane Library (including the Cochrane Central Register of Controlled Trials (CENTRAL),  
64 CINAHL, ASSIA, PsycINFO, PubMed incorporating MEDLINE, Web of Science, and the Database of  
65 Abstracts of Reviews of Effects (DARE). Grey literature, including local government reports were also  
66 included to limit publication bias, and to ensure that all relevant literature was identified.

67 Date-range: November 1992 and November 2023.

68 Data management and Screening: Rayyan reference management software was used to store and  
69 manage citations (Rayyan, 2024). Duplicates were removed in the EndNOTE and Rayyan. Citations  
70 were screened on title and abstract by four members of the review team (ND, LHS, CM, SY and ML).  
71 Full-text articles were retrieved and further assessed for inclusion.

72 **Inclusion criteria:** Papers relating to EWEs' impact on UK population public health outcomes written  
73 in the English language from 1992 to 2023.

74 **Exclusion criteria:** Papers not related to EWEs' influence on UK population public health and  
75 wellbeing outcomes. Any queries regarding inclusion/exclusion were resolved by discussion between  
76 members of the review team.

77 Data extraction: The data was extracted using a pre-defined data extraction tool. The data extraction  
78 tables can be found in Supplementary File 2-4. Quality appraisal was conducted by members of the

79 review team using relevant JBI critical appraisal tools e.g. JBI cohort studies checklist (Joanna Briggs  
80 Institute 2017). Studies were identified as high, medium and low quality.

## 81 Results

82 Forty-eight (48) papers met the inclusion criteria for this systematic review; 22 focussed on flood; 25  
83 focussed on temperature and one focussed on wind. Figure 1 shows a PRISMA flow chart (Page et  
84 al. 2021). A summary of the included studies can be seen in Table 2.

### 85 **Table 2 Study characteristics of included extreme weather event studies**

86

87 The health economists in this authorship team (ML and LHS) were interested in the cost elements of  
88 EWEs outcomes. Although the search strategy included for health economic information whilst data  
89 extractions were conducted, only one of the papers included a health economic aspect (Disability  
90 adjusted life years, DALY's), but no cost to the NHS specific papers (Fewtrell and Kay, 2008).

91 Through narrative analysis, three themes were evident to describe the resulting health  
92 consequences of EWEs: physical health impacts; mental health impacts and social health impacts.  
93 Findings from the studies reviewed will be discussed in the context of these themes in the following  
94 section.

95

### 96 **Figure 1: PRISMA study selection flowchart (Page et al., 2021)**

97

## 98 Discussion

### 99 **Physical health impacts**

#### 100 *Temperature Extremes*

101 Heatwaves are the most frequently discussed EWE to impact on physical health. Long periods of  
102 heat are known to cause heat strokes and contribute to an increase in other cardio-respiratory  
103 health conditions and emergency hospital admissions (Alahmad et al., 2023). A number of  
104 quantitative studies have demonstrated the link between excess mortality and extreme heat  
105 (Rooney et al., 1998; Johnson et al., 2005; Arbuthnott & Hajat, 2017; Alahmad et al., 2023), and  
106 between hospital admissions and extreme heat (Kovats et al., 2004; Rizmie et al., 2022).

107 Respiratory illness is the most commonly reported cause of mortality during heatwaves (Rooney et  
108 al. 1998; Kovats et al. 2004; Arbuthnott and Hajat 2017). A study in Greater London found increases  
109 in emergency admissions for respiratory and renal disease were related to heat, particularly among  
110 under 5s, and those over 75 (for respiratory disease) (Kovats et al., 2004). An association between  
111 heat and daily mortality was also observed during the 2003 heatwave in England and Wales, marked  
112 by a significant short-term rise in deaths. This was particularly notable in London, where mortality  
113 among those over 75 increased by 59%. Elevated levels of ozone and particulate matter were also  
114 recorded during the heatwave. (Johnson et al., 2005). Furthermore, a study of the 1995 heatwave in  
115 England and Wales indicated that up to 62% (London) and 38% (rest of England and Wales) of excess  
116 deaths may be attributable to concomitant increases in air pollution (Rooney et al. 1998). Increased  
117 heat vulnerability has been observed in areas with high population density, significant urbanization,  
118 low coverage of green space, and elevated levels of fine particulate matter (Zhang et al., 2023).  
119 Urban heat islands (UHIs) have been found to experience a higher heat-related mortality (up to 50%)

120 more than surrounding areas (Heaviside et al., 2016). The UHI effect is compounded by the  
121 coinciding increase in air pollution, further impacting public health. A typical heatwave in 2080  
122 (under a medium emissions scenario) could result in a mortality rate approximately three times  
123 higher than that of 2003, when accounting for factors such as population changes, population  
124 distribution, and the urban heat island effect, assuming no future changes in heat adaptation  
125 (Heaviside et al., 2016).

126

127 The links between heat and other health outcomes are less consistent (Arbuthnott and Hajat, 2017).  
128 Alahmad *et al.* (2023) observed an increase in the risk for cardiovascular disease (CVD) mortality  
129 associated with heat (Alahmad et al. 2023). This study also investigated cold extremes, finding CVD  
130 mortality to be four times greater during the cold extremes than hot extremes. A further study of  
131 temperature extremes found that a greater number of hospitalisations were correlated with  
132 extreme cold than with extreme heat (Rizmie et al., 2022). In contrast to earlier studies, Rizmie *et al.*  
133 (2022) found respiratory diseases contributed less to the increased admissions (9.2%) than other  
134 conditions; metabolic diseases had the largest effect magnitude (25.8%), followed by infectious  
135 diseases (21.1%) at temperatures >30°C (Rizmie et al., 2022). Research in Scotland found that  
136 mortality risk began to rise when temperatures exceeded 14.5°C, suggesting that heat-related health  
137 impacts can occur even at relatively low temperatures in cooler climates (Wan et al. 2022). The  
138 authors highlight that in places such as Scotland, where cold extremes are more commonly  
139 experienced, heatwaves remain an invisible threat, perhaps highlighted by the absence of a  
140 heatwave plan in the devolved nations.

141

142 Excess deaths were not observed in England during the 2013 heatwave, when compared to similar  
143 sustained heatwaves in 2003 and 2006 (Green et al., 2016), whilst the 1976 heatwave (Hajat et al.  
144 2002) and the 2020 heatwaves (Thompson et al., 2022) were found to be associated with  
145 significantly higher numbers of deaths compared to other hot periods. The reasons for this remain  
146 unclear, indicating the presence of unknown factors. However, there was no evidence to suggest  
147 that the heatwaves increased the proportion of deaths occurring in different settings or that the  
148 COVID-19 pandemic altered the primary underlying causes of death during a heatwave. (Thompson  
149 et al., 2022).

150

151 The demographics of the population experiencing heatwaves influences the health impacts. A review  
152 of the UK heatwave literature found the over 65 age group, people with neurological and psychiatric  
153 diagnoses, and those living in Greater London, the Southeast and Eastern regions to be more  
154 vulnerable to heat (Arbuthnott & Hajat, 2017). These findings are further corroborated by a more  
155 recent study, which also discovered that admissions during extreme temperatures were more  
156 prevalent among older individuals and, additionally, those from socioeconomically disadvantaged  
157 backgrounds. (Rizmie et al. 2022). In a study of NHS 24 calls, which indicated infants and over 65s  
158 were more affected by heat, Leonardi *et al.* (2006) highlight that the morbidity of the elderly in  
159 relation to heat is underrepresented in hospital records, as this demographic may be less able to  
160 perceive ambient temperature, and be less inclined to seek healthcare services (Leonardi et al.  
161 2006). This suggests there may be a need for social health support and pre-emptive intervention for  
162 older adults during heatwaves.

163

164 One study examined UV exposure and found that its health implications are complex and highly  
165 influenced by behaviours and sociodemographic factors, such as skin colour. Public health  
166 recommendations could be enhanced by considering both temperature and UV exposure and their  
167 effects on behaviour (Rendell et al. 2020). Drought, an effect of prolonged dry weather, can result in

168 reduction in water quantity and quality, thereby negatively impacting health and well-being through  
169 compromised hygiene and sanitation, food security, and air quality (Bryan et al., 2020). Wildfires, a  
170 less common consequence of extreme heat, can severely impact human health through inhalation of  
171 wood smoke, which impacts particularly on vulnerable populations (respiratory, cardiovascular,  
172 ophthalmic, psychiatric problems and burns (Finlay et al., 2012).

173

#### 174 *Windstorms*

175 Only one moderate quality review investigated the direct health outcomes occurring during a  
176 powerful windstorm (Goldman et al., 2014). Human health can be significantly impacted by storms;  
177 direct effects occur during the storm's impact phase, resulting in deaths and injuries from the force  
178 of the wind. Key dangers include individuals becoming airborne, being struck by flying debris or  
179 falling trees, and road traffic accidents. Furthermore, the exacerbation of chronic illnesses due to  
180 limited access to medical care or medication can also adversely affect health outcomes (Goldman et  
181 al., 2014).

182

#### 183 *Flooding*

184 Flooding in the UK is linked with contaminated water, leading to gastrointestinal illness supplies  
185 (Hunter 2003). *Cryptosporidium* has been found to be the most commonly reported pathogen in  
186 public water supply, with *Campylobacter* being the commonest cause of outbreaks in private water  
187 supplies (Hunter 2003). More recent evidence suggests that up to 3% of the flooded population will  
188 have a gastrointestinal illness after swallowing cumulative amounts of floodwater during the clean-  
189 up process. The use of gloves could help to reduce contact with biological contaminants, though  
190 disposable facemasks were suggested to be more effective (Fewtrell et al., 2011). In addition,  
191 findings of a UK study reveal that flooding of an urban river with input from a wastewater treatment  
192 works above the flooding point was likely to result in greater gastrointestinal effects than flooding  
193 caused by run-off from a more microbiologically pristine area (Fewtrell & Kay, 2008).

194

195 A literature review in 2004 highlighted three flood related chemical incidents in England following  
196 flooding, with health effects including sore throat, nausea, and stomach pains along with skin  
197 irritation. The review led to the development of a checklist for public health response and  
198 investigation for extreme flooding, which included chemical contamination identification events  
199 (Euripidou & Murray, 2004). No recent research was found linking chemical contamination with  
200 flooding.

201

202 An investigation of the long-term effects of flooding on mortality in England and Wales found an  
203 unexpected deficit of deaths in the year after flooding (post-/pre-flood ratio of 0.90, 95% CI 0.82,  
204 1.00). No significant variation was found by age, sex, population density or deprivation, and the  
205 authors suggest displacement may be the reason for the 'deficit of deaths' within the same areas pre  
206 and post flood (Milojevic et al., 2011).

207

#### 208 **Mental health impacts**

##### 209 *Extreme Temperatures*

210 Though heatwaves can have positive impacts on mental health, they can also have negative  
211 consequences (Bryan et al., 2020). A study found that when temperatures exceeded 18°C, each 1°C

212 rise in the average temperature was linked to a 4% increase in suicide and a 5% rise in violent  
213 suicides. During the 1995 heatwave, suicide rates surged by 47%, while no significant change was  
214 observed during the 2003 heatwave (Page et al., 2007). In addition, research has shown an overall  
215 increase in risk of death of 5% per 1°C increase in temperature (95% CI 2.0–7.8) in people with  
216 psychosis, dementia, and substance misuse (Page et al., 2012). The greatest mortality risk was  
217 observed in younger patients and those with a diagnosis of substance misuse, with the authors  
218 noting that heatwave public health strategies should be targeted towards these groups. Whilst none  
219 of the selected studies referred to mental health impacts of cold temperatures, this is likely due to  
220 the selection criteria for this review; the effect of cold weather on mental wellbeing in the UK is  
221 extensively studied, but in relation to sustained cold temperatures rather than ‘extreme cold’ or  
222 ‘coldwaves’.

### 223 *Flooding*

224 Mental health impact is the most significant effect of flooding (Euripidou and Murray 2004). This  
225 negative effect has been demonstrated quantitatively in a number of studies (Reacher et al., 2004;  
226 Fewtrell and Kay, 2008; Mulchandani et al., 2020; Graham et al., 2019). Graham *et al.* (2019) utilised  
227 a national mental health survey to compare incidence of common mental disorder (CMD) and  
228 sociodemographic characteristics of those who had experienced flood-related damage to the home  
229 within the past six months, with those who had not. A multiple regression model, controlling for  
230 socioeconomic factors and health status, found an increase of 50% in the odds of CMD (OR 1.5,  
231 95%CI 1.08; 2.07) in those who experienced flood damage.

232  
233 The effect of flooding has been shown to have lasting effects. One year after flooding, prevalence of  
234 psychological morbidity in flooded participants has been observed (depression 20.1%, anxiety 28.3%  
235 and PTSD 36.2%) (Waite et al., 2017). When compared with unaffected participants, adjusted odds  
236 ratios showed psychological morbidity to be 6-7 times higher in flooded than unaffected participants  
237 (aOR (95% CI): depression 5.91 (3.17-10.99); anxiety 6.50 (3.77–11.24); PTSD 7.19 (4.33-11.93), and  
238 1-2 time higher in participants disrupted by the floods compared to those unaffected (aOR (95% CI):  
239 probable depression 1.56 (0.88-2.76); probable anxiety 1.61 (0.94–2.77); probable PTSD 2.06 (1.27-  
240 3.35) (Waite et al., 2017). Similarly, it has been found that even three years after flooding, 7.9% of  
241 flooded respondents had probable depression, 11.7% had probable anxiety and 17.5% had probable  
242 PTSD, with higher prevalence in the flooded group compared with the unaffected group  
243 (Mulchandani et al. 2020). After adjustment for potential confounders, probable mental health  
244 outcomes were higher in the flooded group compared to the unaffected group, significantly for  
245 probable depression (aOR (95% CI) 8.48 (1.04–68.97) and PTSD (aOR (95% CI) 7.74 (2.24–26.79))  
246 (Mulchandani et al., 2020). This is further supported by another study which used Health Related  
247 Quality of Life (HRQoL) scores (Robin et al., 2020). Median HRQoL scores were lower in the flooded  
248 and disrupted groups compared with unaffected respondents at both two and three years post-  
249 flooding. After two years, associations between exposure to flooding and experiencing anxiety or  
250 depression were observed (aOR (95% CI) 7.7 (4.6–13.5)), persisting, though less apparent, three  
251 years post-flooding (aOR (95% CI) 4.3 (2.5–7.7)) (Robin et al., 2020).

252  
253 The prevalence of mental health conditions appears to increase with the presence and level of flood  
254 water in the home (Paranjothy et al., 2011). All measured mental health symptoms were higher (p  
255 <0.01) in those who had flood water in their home than those who did not. Those with flood water  
256 above floor level had higher odds of mental health conditions (aOR (95% CI) 12.8 (9.3–17.6)) than  
257 those with water below floor level (aOR (95% CI) 3.0 (2.0–4.6)). Similarly, Waite *et al.* (2017)  
258 observed increased depth of floodwater to be significantly associated with all mental health

259 conditions; depression, for example, ranged from aOR (95% CI) 4.58 (2.38-8.80) for flood depth  
260 <30cm, to aOR (95% CI) 8.48 (4.21-17.10) for 30-100cm, and aOR (95% CI) 14.71 (4.45 – 48.62) for  
261 flood depth >100cm. Paranjothy et al. (2011) also highlight subsequent disruption to services and  
262 power, more often experienced with greater flood depths, to be negatively associated with mental  
263 health outcomes.

264

265 Displacement from the home has been found to worsen flooding's impact on mental health. Those  
266 who had to relocate for over six months were six times more likely to experience mental health  
267 issues than those that did not need to relocate (Lamond et al., 2015). Two further studies support  
268 this, finding displacement from home to be significantly associated with higher scores for  
269 depression, anxiety and PTSD, and individuals with poor health who had to vacate their home, along  
270 with having no previous knowledge of flooding experienced greatest levels of psychological distress  
271 (Mason et al., 2010; Munro et al., 2017).

272 The prevalence of depression was higher among respondents who experienced repeated flooding  
273 compared to those affected only once, but this difference was not statistically significant after  
274 adjustment. Additionally, there were no differences in anxiety or PTSD levels, and only minimal  
275 differences in overall HRQoL between the two groups (French et al., 2019). It could be suggested  
276 that experiencing flooding on one occasion allows those affected to build resilience for future similar  
277 events, indeed authors have observed that those without prior knowledge of flooding experienced  
278 greater distress (Paranjothy et al., 2011). Individuals who experienced a flood reported feeling  
279 unprepared and unsure of how to safely deal with flood water and potentially contaminated  
280 possessions (Cruz et al., 2020). Depression and PTSD scores were higher in individuals who were  
281 displaced and did not receive any warning, compared to those who were warned more than 12  
282 hours before the flooding. Though the difference in anxiety scores was not significant, these findings  
283 suggest that receiving advanced warning may offer protection against mental health issues (Munro  
284 et al., 2017).

285 Exploratory research has sought to explore the underlying mechanisms linking flooding to mental  
286 health outcomes. It has been observed that it is often not the flooding itself, but the recovery  
287 process that can be difficult to deal with: 'project managing', 'fighting', 'loss of treasured  
288 possessions', and 'stripping-out the home' (Medd et al. 2014). This study underlined the value of  
289 understanding and developing the flood recovery process to enhance resilience and preparedness  
290 for future floods. It is crucial to provide support and space for flood victims to share their  
291 experiences and be heard, which can assist in their recovery and contribute to better flood  
292 management strategies. Various authors support the notion that the after-effects of flooding on  
293 mental health may be prolonged, as those affected not only need to rebuild their lives after flooding,  
294 but also need to build resilience to cope with the continued threat of living in a flooding hot spot  
295 (Medd et al. 2014; Fothergill et al. 2021; Mehring et al. 2023). Interventions that empower  
296 individuals living with ongoing flood risk are thought to potentially enhance psychological resilience  
297 (Fothergill et al. 2021).

298 It has been suggested that prioritising long-term psychological support from both formal and  
299 informal sources should be central to strategies addressing the impacts of flooding; flooding is likely  
300 to increase demand for primary care, counselling, and voluntary services, while also placing  
301 considerable strain on informal support networks (Findlater et al., 2023), therefore targeting  
302 vulnerable groups is essential. Additionally, reinstating access to public transport, education, work,  
303 and health and social care services as soon as possible may be protective against mental health  
304 morbidity (Waite et al. 2017)

305

306 **Social health**

307 The literature consistently shows that various socio-economic factors, such as income, age, gender,  
308 pre-existing health conditions, and family structure, are linked to increased vulnerability to flooding  
309 (Tapsell et al. 2002; Paranjothy et al. 2011; Medd et al. 2014). Women, ethnic minorities, those with  
310 lower income levels and older people (aged over 65 years) were found to be more affected (Cruz et  
311 al. 2020). The effects of flooding on mental health are not equally distributed; the impacts vary  
312 according to gender comorbidities, socioeconomic status and level of damage or disruption  
313 experienced during an EWE. Females have been found to score more highly on PTSD, anxiety and  
314 depression scores than males, as have those in poor general health (Mason et al., 2010). Mental  
315 health conditions were 3-5 times higher among the more socio-economically deprived Yorkshire  
316 study area than in Worcestershire, and were significantly more likely in women, unemployed, and  
317 people with comorbidities (Paranjothy et al., 2011). The importance of risk factors for common  
318 mental health disorders was similarly observed by Graham *et al.* (2019), specifically for females,  
319 those living in a deprived area, financial debt, comorbidities, and alcohol abuse (Graham et al.,  
320 2019). Findings also suggest that lower income households are less likely to report storm or flood  
321 damage to their homes, or may be less likely to have contents insurance, resulting in under-  
322 representation in the figures generated by insurance companies (Graham et al., 2019).

323 Evidence highlights the inadequacy of modelling studies to measure and predict flood damage and  
324 recovery, as they cannot account for non-measurable, intangible aspects of flooding, nor for the  
325 secondary impacts encountered during the recovery process (Tapsell et al. 2002; Medd et al. 2014);  
326 both studies pointed to the meaning of home and neighbourhood, and how that can change  
327 throughout the recovery process. Higher odds of mental illness have been associated with a  
328 disruption to health and social care, and work/education amongst those living in flood-affected  
329 areas (Waite et al., 2017). Instead of experiencing a steady progression toward normalisation,  
330 participants in a qualitative study described a pattern of highs and lows influenced by other life  
331 events, and placed importance on the quality of their interactions with the agencies involved in the  
332 recovery process (Carroll, Balogh, et al., 2010). The wider community is also affected, with front line  
333 workers report suffering from overwork, stress, and emotional turmoil, and that support was  
334 unavailable (Carroll, Balogh, et al., 2010).

335 Geographical patterning of deprivation tends to see seaside towns housing the most deprived  
336 communities, whilst riverside locations tend to be home to the most affluent in society (Graham et  
337 al., 2019). A mapping study revealed that areas most at risk of significant future flooding increases  
338 were coastal or situated along major estuaries, rather than those prone to river flooding (Oven et al.,  
339 2012), further compounding inequalities. The Scottish population is understudied relative to  
340 England, yet people in Scotland may be more vulnerable to temperature extremes due to the  
341 already higher mortality rate (inequality, negative health behaviours, deprivation) (Wan et al., 2022).

342

343 Temperature extremes are also not experienced equally. Not only has it been suggested that higher  
344 nighttime temperatures associated with greater socio-economic deprivation may contribute to  
345 excess mortality (Rooney et al., 1998), research has found infant sleep to be compromised during  
346 hot weather, with the authors highlighting that even mild sleep deprivation can negatively impact  
347 concentration and learning ability (Berger et al. 2023). Considering those from lower socio-economic  
348 groups are again likely to be the most disadvantaged, this has potential to further widen the  
349 inequality gap.

350



351 Future research should consider housing conditions, socioeconomic conditions and segregating  
352 mortality type (by disease/age/sociodemographic factors) to calculate risk for vulnerable  
353 populations regarding extreme heat (Sahani et al., 2022). Preventative approaches to build resilience  
354 within communities are recommended (Cruz et al., 2020).  
355

### 356 Conclusion

357 Though the evidence of EWEs impact on health is overwhelming, little progress has been made in  
358 recent years to mitigate the impacts. The needs are clear: joined -up, multi-agency research and  
359 future planning is essential to allow the UK's health service to meet the needs of the population.  
360 Integrated Health and Social Care Partnerships which focus on anticipatory and preventative care  
361 (UK Government 2022b; Scottish Government 2024) will no doubt benefit holistic health. There is a  
362 need for climate-related health planning to consider the impact on the ageing populations, given  
363 those over 65 are more affected by EWEs (Kovats and Brisley 2021). This suggests a need for closer  
364 proactive monitoring of older people during EWEs, and may provide an opportunity for the use of  
365 telehealth methods, in line with current strategy (Scottish Government 2021).

366 Further research on preparedness for EWEs is needed, including consideration of how to record and  
367 compile information about EWEs and develop risk assessments, assess vulnerabilities and adaption  
368 over time (Stott et al. 2016; Clarke et al. 2021). Syndromic surveillance is becoming popular as a  
369 method of tracking impacts of EWEs (Curtis et al., 2017). There is potential for complementing  
370 experiential learning with targeted mitigation support to build resilience, especially in communities  
371 likely to experience further flooding (Lamond et al. 2015). Recognising that interventions which rely  
372 on behavioural change are unlikely to be equally adopted, thereby exacerbating inequalities, there is  
373 a need to plan for supporting communities, particularly low-income families, to prepare for EWEs  
374 (Kovats & Brisley, 2021; Marmot, 2020).

375 Preparedness should include response strategies from health and social care providers as well as  
376 emergency response strategies (Curtis et al., 2017). To meaningfully plan to support those affected  
377 by EWEs, there is a need to build NHS costs and psycho-social impacts into future cost-benefit  
378 analyses in prospective EWE studies examining health impacts and outcomes. There is scope to  
379 support the development of policy and interventions for building resilience at a community and  
380 societal level, while taking account of health system needs and efficiencies required during and post  
381 EWE's.

382

### 383 Strengths

- 384 • Included evidence on the health outcomes of EWEs from the past 30 years.
- 385 • Health outcomes following EWEs presented from a UK perspective.

### 386 Limitations

- 387 • A limited number of extreme cold studies were included in this review. This might be due to  
388 the limitations of the search strategy, and 'extreme cold' or 'cold wave' not featuring  
389 commonly in the literature.
- 390 • There was a dearth of included studies from Wales, Scotland and Northern Ireland.

### 391 Recommendations

- 392 ☐ Future research exploring the impacts of EWEs should include Cost Benefit Analysis (CBA).
- 393 ☐ Support the integration of health and social care services to provide holistic preventative  
394 action against EWE induced health impacts.

395        ☑ Develop strategies to build resilience among individuals, communities and health and care  
396            systems for future EWE's.

397        ☑ Closer monitoring of vulnerable groups.

## 398    References

399    Alahmad B, Khraishah H, Royé D, et al (2023) Associations Between Extreme Temperatures and  
400        Cardiovascular Cause-Specific Mortality: Results From 27 Countries. *Circulation* 147:35–46.  
401        <https://doi.org/10.1161/CIRCULATIONAHA.122.061832>

402

403    Arbutnott KG, Hajat S (2017) The health effects of hotter summers and heat waves in the  
404        population of the United Kingdom: A review of the evidence. *Environ Health* 16:1–13.  
405        <https://doi.org/10.1186/s12940-017-0322-5>

406

407    Berger SE, Ordway MR, Schoneveld E, et al (2023) The impact of extreme summer temperatures in  
408        the United Kingdom on infant sleep: Implications for learning and development. *Sci Rep* 13:1–  
409        8. <https://doi.org/10.1038/s41598-023-37111-2>

410

411    Bryan K, Ward S, Roberts L, et al (2020) The health and well-being effects of drought: assessing  
412        multi-stakeholder perspectives through narratives from the UK. *Clim Change* 163:2073–2095.  
413        <https://doi.org/10.1007/s10584-020-02916-x>

414

415    Calvin K, Dasgupta D, Krinner G, et al (2023) IPCC, 2023: Climate Change 2023: Synthesis Report.  
416        Contribution of Working Groups I, II and III to the Sixth Assessment Report of the  
417        Intergovernmental Panel on Climate Change [Core Writing Team, H. Lee and J. Romero (eds.)].  
418        IPCC, Geneva, Switzerland.

419

420    Carroll B, Balogh R, Morbey H, Araoz G (2010) Health and social impacts of a flood disaster:  
421        responding to needs and implications for practice. *Disasters* 34:1045–1063.  
422        <https://doi.org/10.1111/j.1467-7717.2010.01182.x>

423

424    Clarke BJ, E. L. Otto F, Jones RG (2021) Inventories of extreme weather events and impacts:  
425        Implications for loss and damage from and adaptation to climate extremes. *Clim Risk Manag*  
426        32:. <https://doi.org/10.1016/j.crm.2021.100285>

427

428    Cruz J, White PCL, Bell A, Coventry PA (2020) Effect of extreme weather events on mental health: A  
429        narrative synthesis and meta-analysis for the UK. *Int J Environ Res Public Health* 17:1–17.  
430        <https://doi.org/10.3390/ijerph17228581>

431

- 432 Curtis S, Fair A, Wistow J, et al (2017) Impact of extreme weather events and climate change for  
433 health and social care systems. *Environ Health* 16:. <https://doi.org/10.1186/s12940-017-0324-3>  
434
- 435 Euripidou E, Murray V (2004) Public health impacts of floods and chemical contamination. *J Public*  
436 *Health (Bangkok)* 26:376–383. <https://doi.org/10.1093/pubmed/fdh163>  
437
- 438 Fewtrell L, Kay D (2008) An attempt to quantify the health impacts of flooding in the UK using an  
439 urban case study. *Public Health* 122:446–451. <https://doi.org/10.1016/j.puhe.2007.09.010>  
440
- 441 Fewtrell L, Kay D, Watkins J, et al (2011) The microbiology of urban UK floodwaters and a  
442 quantitative microbial risk assessment of flooding and gastrointestinal illness. *J Flood Risk*  
443 *Manag* 4:77–87. <https://doi.org/10.1111/j.1753-318X.2011.01092.x>  
444
- 445 Findlater L, Robin C, Hopgood K, et al (2023) Help-seeking following a flooding event: a cross-  
446 sectional analysis of adults affected by flooding in England in winter 2013/14. *Eur J Public*  
447 *Health* 33:834–840. <https://doi.org/10.1093/eurpub/ckad082>  
448
- 449 Finlay SE, Moffat A, Gazzard R, et al (2012) Health impacts of wildfires. *PLoS Curr* 1–17.  
450 <https://doi.org/10.1371/4f959951cce2c>  
451
- 452 Fothergill LJ, Disney AS, Wilson EE (2021) A qualitative exploration of the psychological impacts of  
453 living with the uncertainty of persistent flood risk. *Public Health* 198:141–145.  
454 <https://doi.org/10.1016/j.puhe.2021.07.016>  
455
- 456 French CE, Waite TD, Armstrong B, et al (2019) Impact of repeat flooding on mental health and  
457 health-related quality of life: A cross-sectional analysis of the English National Study of Flooding  
458 and Health. *BMJ Open* 9:. <https://doi.org/10.1136/bmjopen-2019-031562>  
459
- 460 Goldman A, Eggen B, Golding B, Murray V (2014) The health impacts of windstorms: A systematic  
461 literature review. *Public Health* 128:3–28. <https://doi.org/10.1016/j.puhe.2013.09.022>  
462
- 463 Graham H, White P, Cotton J, McManus S (2019) Flood- and weather-damaged homes and mental  
464 health: An analysis using England’s mental health survey. *Int J Environ Res Public Health* 16:.  
465 <https://doi.org/10.3390/ijerph16183256>  
466

- 467 Green HK, Andrews N, Armstrong B, et al (2016) Mortality during the 2013 heatwave in England -  
468 How did it compare to previous heatwaves? A retrospective observational study. *Environ Res*  
469 147:343–349. <https://doi.org/10.1016/j.envres.2016.02.028>
- 470
- 471 Hajat S, Kovats RS, Atkinson RW, Haines A (2002) Impact of hot temperatures on death in {London};  
472 a time series approach. *J Epidemiol Community Health* (1978) 56:367
- 473
- 474 Heaviside C, Vardoulakis S, Cai XM (2016) Attribution of mortality to the urban heat island during  
475 heatwaves in the West Midlands, UK. *Environ Health* 15:. [https://doi.org/10.1186/s12940-016-](https://doi.org/10.1186/s12940-016-0100-9)  
476 0100-9
- 477
- 478 Hunter PR (2003) Climate change and waterborne and vector-borne disease. *Journal of Applied*  
479 *Microbiology Symposium Supplement* 94:37–46. <https://doi.org/10.1046/j.1365-2672.94.s1.5.x>
- 480
- 481 Joanna Briggs Institute (2017) Checklist for Analytical Cross Sectional Studies. In: Joanna Briggs  
482 Institute Reviewer’s Manual. [https://jbi.global/sites/default/files/2019-](https://jbi.global/sites/default/files/2019-05/JBI_Critical_Appraisal-Checklist_for_Analytical_Cross_Sectional_Studies2017_0.pdf)  
483 05/JBI\_Critical\_Appraisal-Checklist\_for\_Analytical\_Cross\_Sectional\_Studies2017\_0.pdf
- 484
- 485 Johnson H, Kovats RS, McGregor G, et al (2005) The impact of the 2003 heat wave on daily mortality  
486 in England and Wales and the use of rapid weekly mortality estimates. *Euro Surveill* 10:168–  
487 171. <https://doi.org/10.2807/esm.10.07.00558-en>
- 488
- 489 Kovats RS, Hajat S, Wilkinson P (2004) Contrasting patterns of mortality and hospital admissions  
490 during hot weather and heat waves in Greater London, UK. *Occup Environ Med* 61:893–898.  
491 <https://doi.org/10.1136/oem.2003.012047>
- 492
- 493 Kovats S, Brisley R (2021) Third UK Climate Change Risk Assessment Technical Report UK Climate Risk  
494 Independent Assessment (CCRA3) Chapter 5: Health, Communities and the Built Environment
- 495
- 496 Lamond JE, Joseph RD, Proverbs DG (2015) An exploration of factors affecting the long term  
497 psychological impact and deterioration of mental health in flooded households. *Environ Res*  
498 140:325–334. <https://doi.org/10.1016/j.envres.2015.04.008>
- 499
- 500 Leonardi GS, Hajat S, Kovats RS, et al (2006) Syndromic surveillance use to detect the early effects of  
501 heat-waves: An analysis of NHS direct data in England. *Soz Praventivmed* 51:194–201.  
502 <https://doi.org/10.1007/s00038-006-5039-0>
- 503

- 504 Marmot M (2020) Health equity in England: The Marmot review 10 years on. *The BMJ* 368:.  
505 <https://doi.org/10.1136/bmj.m693>
- 506
- 507 Mason V, Andrews H, Upton D (2010) The psychological impact of exposure to floods. *Psychol Health*  
508 *Med* 15:61–73. <https://doi.org/10.1080/13548500903483478>
- 509
- 510 Medd W, Deeming H, Walker G, et al (2014) The flood recovery gap: A real-time study of local  
511 recovery following the floods of June 2007 in Hull, North East England. *J Flood Risk Manag*  
512 8:315–328. <https://doi.org/10.1111/jfr3.12098>
- 513
- 514 Mehring P, Geoghegan H, Cloke HL, Clark JM (2023) The F word: The experiential construction of  
515 flooding in England. *Emot Space Soc* 48:100966.  
516 <https://doi.org/10.1016/j.emospa.2023.100966>
- 517
- 518 Met Office HC (2022) UK Climate Projections: Headline Findings
- 519
- 520 Milojevic A, Armstrong B, Kovats S, et al (2011) Long-term effects of flooding on mortality in England  
521 and Wales, 1994-2005: Controlled interrupted time-series analysis. *Environ Health* 10:1–9.  
522 <https://doi.org/10.1186/1476-069X-10-11>
- 523
- 524 Mulchandani R, Armstrong B, Beck CR, et al (2020) The English National Cohort Study of Flooding &  
525 Health: Psychological morbidity at three years of follow up. *BMC Public Health* 20:1–7.  
526 <https://doi.org/10.1186/s12889-020-8424-3>
- 527
- 528 Munro A, Kovats RS, Rubin GJ, et al (2017) Effect of evacuation and displacement on the association  
529 between flooding and mental health outcomes: a cross-sectional analysis of UK survey data.  
530 *Lancet Planet Health* 1:e134–e141. [https://doi.org/10.1016/S2542-5196\(17\)30047-5](https://doi.org/10.1016/S2542-5196(17)30047-5)
- 531
- 532 Oven KJ, Curtis SE, Reaney S, et al (2012) Climate change and health and social care: Defining future  
533 hazard, vulnerability and risk for infrastructure systems supporting older people’s health care  
534 in England. *Applied Geography* 33:16–24. <https://doi.org/10.1016/j.apgeog.2011.05.012>
- 535
- 536 Page LA, Hajat S, Kovats RS (2007) Relationship between daily suicide counts and temperature in  
537 England and Wales. *British Journal of Psychiatry* 191:106–112.  
538 <https://doi.org/10.1192/bjp.bp.106.031948>
- 539

- 540 Page LA, Hajat S, Sari Kovats R, Howard LM (2012) Temperature-related deaths in people with  
541 psychosis, dementia and substance misuse. *British Journal of Psychiatry* 200:485–490.  
542 <https://doi.org/10.1192/bjp.bp.111.100404>
- 543
- 544 Page M, McKenzie J, Bossuyt P, et al (2021) The PRISMA 2020 statement: an updated guideline for  
545 reporting systematic reviews. *BMJ* 10:. <https://doi.org/doi.org/10.1186/s13643-021-01626-4>
- 546
- 547 Paranjothy S, Gallacher J, Amlôt R, et al (2011) Psychological impact of Summer 2007 floods in  
548 England. *BMC Public Health* 11:145–153
- 549
- 550 Reacher M, McKenzie K, Lane C, et al (2004) Health impacts of flooding in Lewes: a comparison of  
551 reported gastrointestinal and other illness and mental health in flooded and non-flooded  
552 households. *Communicable disease and public health / PHLS* 7:39–46
- 553
- 554 Rendell R, Higglett M, Khazova M, O’hagan J (2020) Public Health Implications of Solar UV Exposure  
555 during Extreme Cold and Hot Weather Episodes in 2018 in Chilton, South East England. *J*  
556 *Environ Public Health* 2020:33–35. <https://doi.org/10.1155/2020/2589601>
- 557
- 558 Rizmie D, de Preux L, Miraldo M, Atun R (2022) Impact of extreme temperatures on emergency  
559 hospital admissions by age and socio-economic deprivation in England. *Soc Sci Med*  
560 308:115193. <https://doi.org/10.1016/j.socscimed.2022.115193>
- 561
- 562 Robin C, Beck C, Armstrong B, et al (2020) Impact of flooding on health-related quality of life in  
563 England: Results from the National Study of Flooding and Health. *Eur J Public Health* 30:942–  
564 948. <https://doi.org/10.1093/eurpub/ckaa049>
- 565
- 566 Rooney C, McMichael AJ, Kovats RS, Coleman MP (1998) Excess mortality in England and Wales, and  
567 in Greater London, during the 1995 heatwave. *J Epidemiol Community Health* (1978) 52:482–  
568 486. <https://doi.org/10.1136/jech.52.8.482>
- 569
- 570 Sahani J, Kumar P, Debele S, Emmanuel R (2022) Heat risk of mortality in two different regions of the  
571 United Kingdom. *Sustain Cities Soc* 80:103758. <https://doi.org/10.1016/j.scs.2022.103758>
- 572
- 573 Schardt C, Adams MB, Owens T, et al (2007) Utilization of the PICO framework to improve searching  
574 PubMed for clinical questions. *BMC Med Inform Decis Mak* 7:1–6.  
575 <https://doi.org/10.1186/1472-6947-7-16>
- 576

- 577 Scottish Government (2024) Health and social care integration: progress review.  
578 [https://www.gov.scot/publications/ministerial-strategic-group-health-community-care-review-](https://www.gov.scot/publications/ministerial-strategic-group-health-community-care-review-progress-integration-health-social-care-final-report/documents/)  
579 [progress-integration-health-social-care-final-report/documents/](https://www.gov.scot/publications/ministerial-strategic-group-health-community-care-review-progress-integration-health-social-care-final-report/documents/). Accessed 21 Aug 2024
- 580
- 581 Scottish Government (2021) Digital Health Care Strategy.  
582 <https://www.gov.scot/publications/scotlands-digital-health-care-strategy/>. Accessed 26 Aug  
583 2024
- 584
- 585 Stott PA, Christidis N, Otto FEL, et al (2016) Attribution of extreme weather and climate-related  
586 events. *Wiley Interdiscip Rev Clim Change* 7:23–41. <https://doi.org/10.1002/wcc.380>
- 587
- 588 Tapsell SM, Penning-Rowsell EC, Tunstall SM, Wilson TL (2002) Vulnerability to flooding: health and  
589 social dimensions. *Philos Trans R Soc Lond* 1511–1525
- 590
- 591 Thompson R, Landeg O, Kar-Purkayastha I, et al (2022) Heatwave Mortality in Summer 2020 in  
592 England: An Observational Study. *Int J Environ Res Public Health* 19:.  
593 <https://doi.org/10.3390/ijerph19106123>
- 594
- 595 UK Government (2022a) UK Climate Change Risk Assessment 2022
- 596
- 597 UK Government (2022b) Health and social care integration: joining up care for people, places and  
598 populations. [https://www.gov.uk/government/publications/health-and-social-care-integration-](https://www.gov.uk/government/publications/health-and-social-care-integration-joining-up-care-for-people-places-and-populations/health-and-social-care-integration-joining-up-care-for-people-places-and-populations)  
599 [joining-up-care-for-people-places-and-populations/health-and-social-care-integration-joining-](https://www.gov.uk/government/publications/health-and-social-care-integration-joining-up-care-for-people-places-and-populations/health-and-social-care-integration-joining-up-care-for-people-places-and-populations)  
600 [up-care-for-people-places-and-populations](https://www.gov.uk/government/publications/health-and-social-care-integration-joining-up-care-for-people-places-and-populations/health-and-social-care-integration-joining-up-care-for-people-places-and-populations). Accessed 21 Aug 2024
- 601
- 602 Waite TD, Chaintarli K, Beck CR, et al (2017) The English national cohort study of flooding and health:  
603 cross-sectional analysis of mental health outcomes at year one. *BMC Public Health* 17:1–9.  
604 <https://doi.org/10.1186/s12889-016-4000-2>
- 605
- 606 Walsh JE, Ballinger TJ, Euskirchen ES, et al (2020) Extreme weather and climate events in northern  
607 areas: A review. *Earth Sci Rev* 209
- 608
- 609 Wan K, Feng Z, Hajat S, Doherty RM (2022) Temperature-related mortality and associated  
610 vulnerabilities: evidence from Scotland using extended time-series datasets. *Environ Health*  
611 21:1–14. <https://doi.org/10.1186/s12940-022-00912-5>
- 612

613 Weilhammer V, Schmid J, Mittermeier I, et al (2021) Extreme weather events in Europe and their  
614 health consequences – A systematic review. *Int J Hyg Environ Health* 233

615

616 Zhang S, Breitner S, Rai M, et al (2023) Assessment of short-term heat effects on cardiovascular  
617 mortality and vulnerability factors using small area data in Europe. *Environ Int* 179:108154.  
618 <https://doi.org/10.1016/j.envint.2023.108154>

619

620 (2024) Rayyan. <https://www.rayyan.ai/about-us>. Accessed 26 Apr 2024

621

622

### 623 [Conflict of interest](#)

624 The authors declare no conflicts of interest.

625

### 626 [Acknowledgements](#)

627 The authors would like to thank Margo Stewart, Academic Librarian (Health & Life Sciences),  
628 Associate Fellow, Higher Education Academy, Library, University of the West of Scotland for  
629 providing support to the review team in terms of the search strategy and assisting with the initial  
630 searches for this systematic review. The Universities of the West of Scotland, University of South  
631 Wales, and the Royal College of Surgeons Ireland supported the researchers time on this systematic  
632 review.

### 633 [Funding Source](#)

634 This systematic review was not funded by a research grant or award.

### 635 [Author Contribution](#)

636 Conceptualisation: ND and ML; Methodology: ND, LHS, SY and ML. Writing-drafting, reviewing and  
637 editing: ND, LHS, SY and ML.

### 638 [Disclaimer](#)

639 The views expressed in this publication are those of the authors, not necessarily The University of  
640 the West of Scotland.

641

### 642 [List of Tables](#)

643 **Table 1: Population, Intervention, Context/Comparator and Outcome (PICO) framework.**

| Population                           | Intervention or exposure                                            | Context/Comparator                                                    | Outcome                                                    |
|--------------------------------------|---------------------------------------------------------------------|-----------------------------------------------------------------------|------------------------------------------------------------|
| Population of the UK affected by EWE | EWEs (defined as heat waves, cold waves, floods, storms, wildfires) | Routine weather events: Normal weather patterns such as average rain, | Tangible evidence relating to the impact of EWEs in the UK |



|  |                 |                              |                                          |
|--|-----------------|------------------------------|------------------------------------------|
|  | and windstorms) | sunlight, wind, air pressure | on public health and wellbeing outcomes. |
|--|-----------------|------------------------------|------------------------------------------|

644

645

**Table 2: Study characteristics of included extreme weather event studies**

| #   | Type of weather event | Author               | Date | Country                         | Quality rating |
|-----|-----------------------|----------------------|------|---------------------------------|----------------|
| 1.  | Flooding              | Carroll et al.       | 2010 | England                         | Moderate       |
| 2.  | Flooding              | Euripidou and Murray | 2004 | England                         | Low            |
| 3.  | Flooding              | Fewtrell and Kay     | 2008 | England                         | High           |
| 4.  | Flooding              | Fewtrell et al.      | 2011 | England                         | High           |
| 5.  | Flooding              | Findlater et al.     | 2023 | England                         | High           |
| 6.  | Flooding              | Fothergill et al.    | 2021 | England                         | Moderate       |
| 7.  | Flooding              | French et al.        | 2019 | England                         | High           |
| 8.  | Flooding              | Graham et al.        | 2019 | England                         | High           |
| 9.  | Flooding              | Hunter               | 2003 | England and Wales               | Low            |
| 10. | Flooding              | Lamond et al.        | 2015 | England                         | High           |
| 11. | Flooding              | Mason et al.         | 2010 | England                         | High           |
| 12. | Flooding              | Medd et al.          | 2014 | England                         | Moderate       |
| 13. | Flooding              | Mehring et al.       | 2023 | England                         | Moderate       |
| 14. | Flooding              | Milojevic et al.     | 2011 | England and Wales               | Moderate       |
| 15. | Flooding              | Milojevic et al.     | 2017 | England                         | Moderate       |
| 16. | Flooding              | Mulchandani et al.   | 2020 | England                         | High           |
| 17. | Flooding              | Munro et al.         | 2017 | England                         | High           |
| 18. | Flooding              | Paranjothy et al.    | 2011 | England                         | High           |
| 19. | Flooding              | Reacher et al.       | 2004 | England                         | Moderate       |
| 20. | Flooding              | Robin et al.         | 2020 | England                         | High           |
| 21. | Flooding              | Tapsell et al.       | 2002 | England                         | High           |
| 22. | Flooding              | Waite et al.         | 2017 | England                         | High           |
| 23. | Heat                  | Alahmad et al.       | 2023 | Worldwide including UK          | High           |
| 24. | Heat                  | Arbuthnott and Hajat | 2017 | UK                              | Moderate       |
| 25. | Heat                  | Berger et al.        | 2023 | UK                              | High           |
| 26. | Heat                  | Bryan et al.         | 2020 | Scotland, England and Wales, UK | Moderate       |
| 27. | Heat                  | Cruz et al.          | 2020 | UK                              | Moderate       |
| 28. | Heat                  | Curtis et al.        | 2017 | England                         | Low            |
| 29. | Heat                  | Finlay et al.        | 2012 | England                         | Moderate       |
| 30. | Heat                  | Green et al.         | 2016 | England                         | High           |

|     |      |                  |      |                             |          |
|-----|------|------------------|------|-----------------------------|----------|
| 31. | Heat | Hajat et al.     | 2002 | England                     | High     |
| 32. | Heat | Heaviside et al. | 2016 | England                     | High     |
| 33. | Heat | Johnson et al.   | 2005 | England and Wales           | Moderate |
| 34. | Heat | Kovats et al.    | 2004 | England                     | High     |
| 35. | Heat | Leonardi et al.  | 2006 | England                     | High     |
| 36. | Heat | Oven et al.      | 2012 | England                     | Low      |
| 37. | Heat | Page et al.      | 2007 | England and Wales           | High     |
| 38. | Heat | Page et al.      | 2012 | UK                          | High     |
| 39. | Heat | Rendell et al.   | 2020 | England                     | High     |
| 40. | Heat | Rizmie et al.    | 2022 | England                     | High     |
| 41. | Heat | Rooney et al.    | 1998 | England and Wales           | High     |
| 42. | Heat | Sahani et al.    | 2022 | England and Scotland        | High     |
| 43. | Heat | Smith et al.     | 2016 | England                     | High     |
| 44. | Heat | Smith et al.     | 2016 | England                     | High     |
| 45. | Heat | Thompson et al.  | 2022 | England                     | High     |
| 46. | Heat | Wan et al.       | 2022 | Scotland                    | High     |
| 47. | Heat | Zhang et al.     | 2023 | UK                          | High     |
| 48. | Wind | Goldman et al.   | 2014 | OECD countries including UK | Moderate |

646 **Note: OECD is an acronym for Organisation for Economic Co-operation and Development**

647

648 [List of Figures](#)

649 **Figure 1: PRISMA study selection flowchart (Page et al., 2021)**

650

651 [List of supplementary files](#)

652 Supplementary file 1 - Search strategy – Extreme Weather Events

653 Supplementary file 2 - Evidence table for Extreme Weather Events (EXE) Systematic review (SR)

654 included papers: Flooding

655 Supplementary file 3 - Evidence table for Extreme Weather Events (EXE) Systematic review (SR)

656 included papers: Extreme heat

657 Supplementary file 4 - Extreme wind study

658 Supplementary file 5 - Table of abbreviations

659 Supplementary file 6 - Quality appraisal tables

660

661 **END**
